# Supplementary material
Source: publisher figshare collection journal article supplement (https://acs.figshare.com/ndownloader/files/14816690)
Supplement: Supplementary file 1 [file 14816690]

## Supporting information

Title of main article: Strain-Level Differentiation of Bacteria by Paper Spray Ionization Mass Spectrometry

Authors: Casey A. Chamberlain<sup>†</sup>, Vanessa Y. Rubio<sup>‡</sup>, Timothy J. Garrett<sup>\*†</sup>

<sup>†</sup>Department of Pathology, Immunology and Laboratory Medicine, University of Florida, Gainesville, Florida 32610, United States

<sup>‡</sup>Department of Chemistry, University of Florida, Gainesville, Florida 32611, United States

### Table of Contents

- Figure S1. Example PSI-MS spectra obtained from OxWR lysates representing 4 of the strain-specific features:  $m/z$  99.0198, 125.0545, 134.0647, 188.0673. 1  $m/z$  windows centered on the targeted ion show competing ions at similar or much larger intensities, making MS/MS isolation even on HRMS difficult for identification purposes. BPI indicates Base Peak Intensity. Asterisk (\*) indicates ion of interest and associated intensity level.
- Table S1. Parameters for PSI-MS instrumentation and methodology used for this study
- Table S2. Predicted chemical formula, adduct, and identification information for strain-exclusive features from CEU Mass Mediator screening the Human Metabolome Database, KEGG, Metlin, and Lipid Maps for exact mass matches (5ppm) to common ESI(+) adducts of known metabolites and lipids.

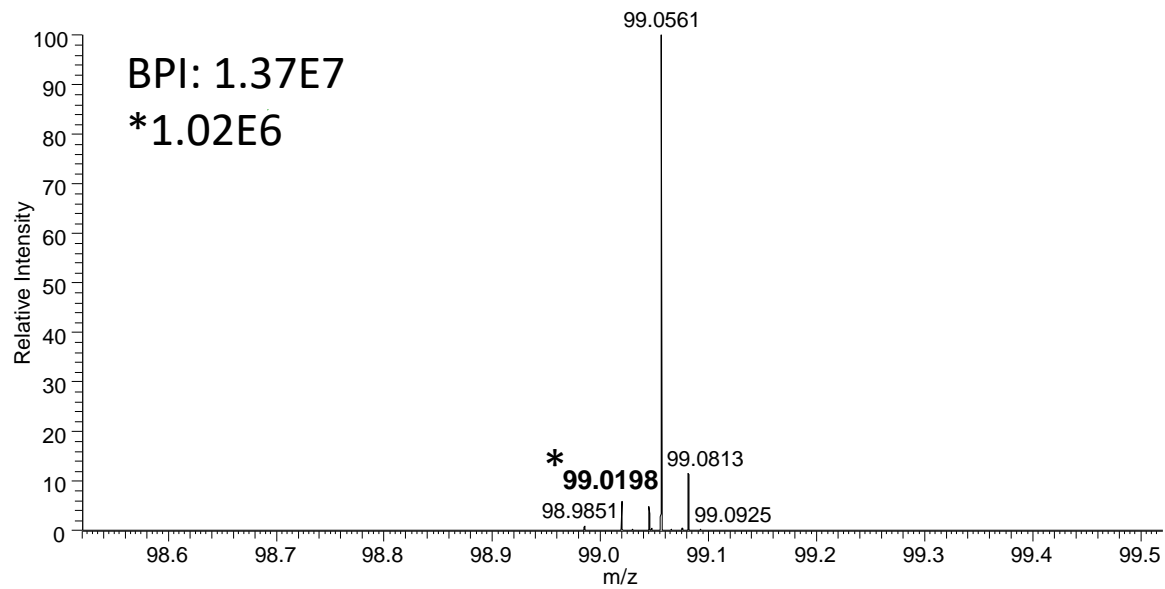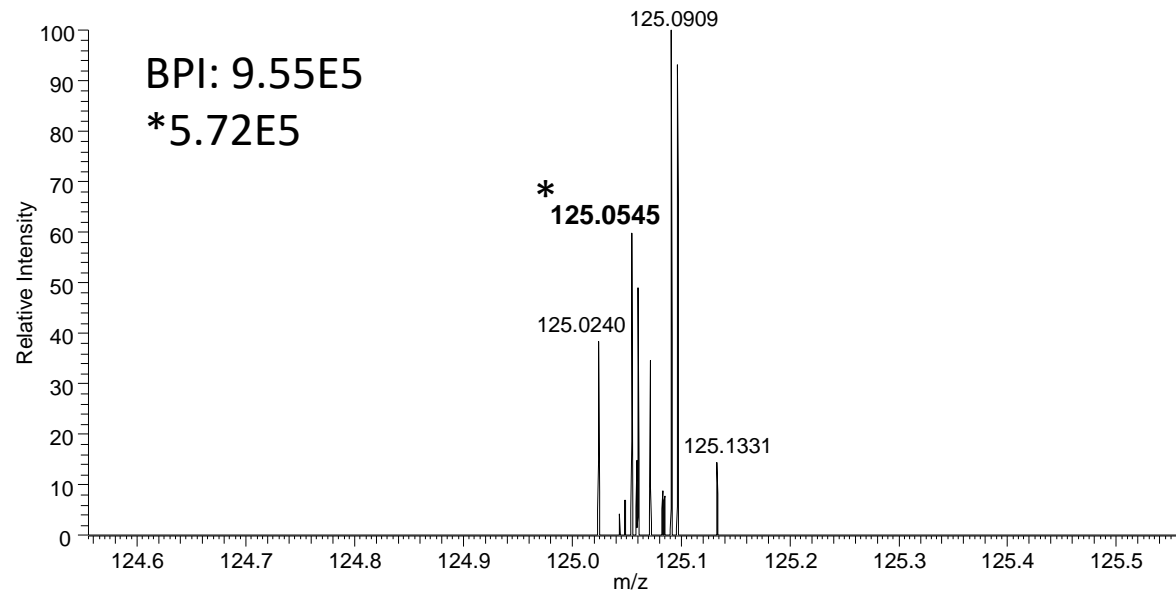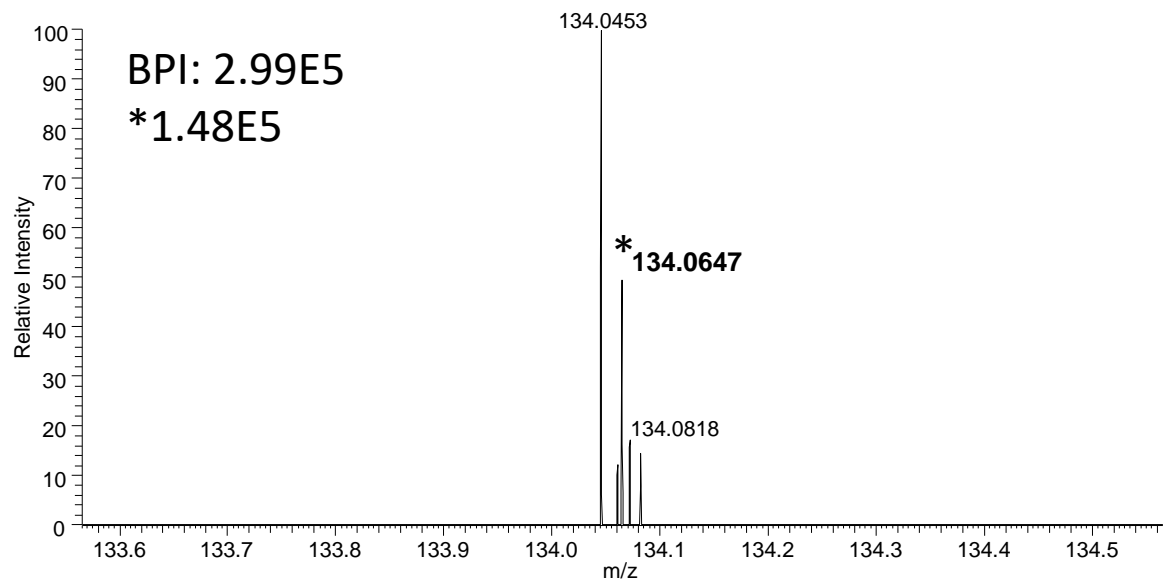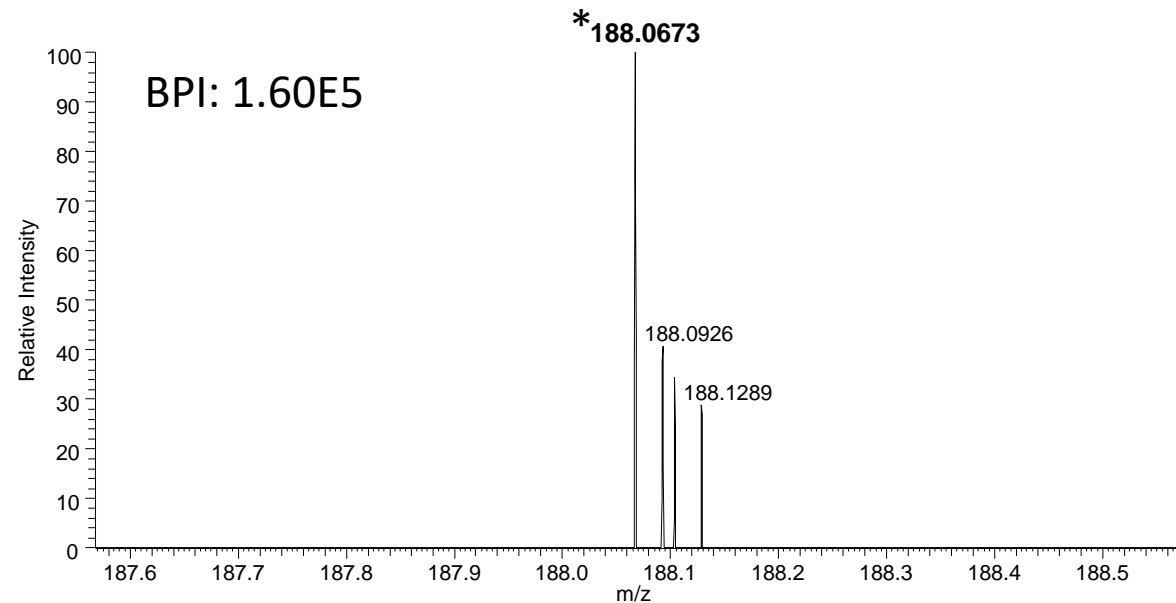

Figure S1. PSI-MS spectra obtained from OxWR lysates representing 4 of the strain-specific features:  $m/z$  99.0198, 125.0545, 134.0647, 188.0673. 1  $m/z$  windows centered on the targeted ion show competing ions at similar or much larger intensities, making MS/MS isolation even on HRMS difficult for identification purposes. BPI indicates Base Peak Intensity. Asterisk (\*) indicates ion of interest and associated intensity level.

Table S1. Parameters for PSI-MS instrumentation and methodology

|                    |                                    |
|--------------------|------------------------------------|
| Mass Spectrometer  | Thermo Q Exactive                  |
| Spray Voltage      | 4.5 kV                             |
| Capillary Temp     | 270° C                             |
| S-Lens RF          | 30%                                |
| Paper Spray System | Prosolia Velox 360                 |
| Solvent            | 4:1 H <sub>2</sub> O:ACN + 0.1% FA |
| Dispensing Steps   | 8                                  |
| Dispense Volume    | 80 µL                              |
| Sample Dispense    | 5                                  |
| Scan               | Full MS                            |
| Mass Range         | 70 - 1,000 <i>m/z</i>              |
| Resolution         | 140,000                            |
| Polarity           | Positive                           |

Table S2. Predicted chemical formula, adduct, and identification information for strain-exclusive features from CEU Mass Mediator screening the Human Metabolome Database, KEGG, Metlin, and Lipid Maps for exact mass matches (5ppm) to common ESI(+) adducts of known metabolites and lipids.

| Experimental Mass ( <i>m/z</i> ) | Strain | Analysis             | Formula   | Adduct                 | Error (PPM) | Name                                                                                                                                    |
|----------------------------------|--------|----------------------|-----------|------------------------|-------------|-----------------------------------------------------------------------------------------------------------------------------------------|
| 75.0325                          | Ox WR  | Lysates, Whole Cells |           |                        |             | <i>No identifications found</i>                                                                                                         |
| 93.0384                          | Ox WR  | Whole Cells          |           |                        |             | <i>No identifications found</i>                                                                                                         |
| 99.0198                          | Ox WR  | Whole Cells          |           |                        |             | <i>No identifications found</i>                                                                                                         |
| 100.0276                         | Ox WR  | Lysates, Whole Cells |           |                        |             | <i>No identifications found</i>                                                                                                         |
| 101.0988                         | Ox WR  | Lysates              |           |                        |             | <i>No identifications found</i>                                                                                                         |
| 105.0303                         | Ox WR  | Whole Cells          |           |                        |             | <i>No identifications found</i>                                                                                                         |
| 115.0145                         | Ox WR  | Lysates              | C3H4N2O4  | [M+H-H2O] <sup>+</sup> | 4           | Oxalurate; Oxaluric acid; Monooxalylurea; Oxalurate; N-Carbamoyl-2-oxoglycine                                                           |
| 121.0251                         | Ox WR  | Whole Cells          |           |                        |             | <i>No identifications found</i>                                                                                                         |
| 125.0545                         | Ox WR  | Lysates, Whole Cells |           |                        |             | <i>No identifications found</i>                                                                                                         |
| 133.0250                         | Ox WR  | Lysates, Whole Cells | C3H4N2O4  | [M+H] <sup>+</sup>     | 5           | Oxalurate; Oxaluric acid; Monooxalylurea; Oxalurate; N-Carbamoyl-2-oxoglycine                                                           |
| 134.0647                         | Ox WR  | Whole Cells          |           |                        |             | <i>No identifications found</i>                                                                                                         |
| 135.0406                         | Ox WR  | Lysates, Whole Cells | C3H6N2O4  | [M+H] <sup>+</sup>     | 4           | (R)-Ureidoglycolate; (+)-Ureidoglycolate; (+)-Ureidoglycolic acid                                                                       |
|                                  |        |                      | C4H12N2S2 | [M+H-H2O] <sup>+</sup> | 3           | Cystamine                                                                                                                               |
| 135.0770                         | Ox WR  | Whole Cells          | C4H10N2O3 | [M+H] <sup>+</sup>     | 4           | L-Canaline                                                                                                                              |
|                                  |        |                      |           |                        |             | N-Nitrosodiethanolamine                                                                                                                 |
| 143.0649                         | Ox WR  | Lysates              |           |                        |             | <i>No identifications found</i>                                                                                                         |
| 157.0807                         | Ox WR  | Lysates              |           |                        |             | <i>No identifications found</i>                                                                                                         |
| 159.0406                         | Ox WR  | Lysates              | C5H6N2O4  | [M+H] <sup>+</sup>     | 4           | L-5-Carboxymethylhydantoin                                                                                                              |
|                                  |        |                      |           |                        |             | Ibotenic acid                                                                                                                           |
|                                  |        |                      |           |                        |             | L-Dihydroorotic acid                                                                                                                    |
|                                  |        |                      |           |                        |             | 4,5-Dihydroorotic acid                                                                                                                  |
|                                  |        |                      | C5H8N2O5  | [M+H-H2O] <sup>+</sup> | 3           | 3-(Carboxycarbonylamino)-L-alanine;<br>N3-Oxalyl-L-2,3-diaminopropanoate;<br>L-alpha-Amino-beta-oxalylaminopropionic acid;<br>beta-ODAP |
|                                  |        |                      |           |                        |             | N-Carbamoyl-DL-aspartic acid                                                                                                            |
|                                  |        |                      |           |                        |             | Ureidosuccinic acid                                                                                                                     |
|                                  |        |                      |           |                        |             | L-3-Amino-2-(oxalylamino)propanoic acid                                                                                                 |
|                                  |        |                      |           |                        |             | L-2-Amino-3-(oxalylamino)propanoic acid                                                                                                 |
| 164.1018                         | Ox WR  | Lysates              |           |                        |             | <i>No identifications found</i>                                                                                                         |
| 174.0516                         | Ox WR  | Lysates, Whole Cells | C5H7N3O4  | [M+H] <sup>+</sup>     | 4           | Azaserine                                                                                                                               |
| 188.0673                         | Ox WR  | Lysates, Whole Cells | C6H9N3O4  | [M+H] <sup>+</sup>     | 4           | 1-(2-Hydroxyethyl)-2-hydroxymethyl-5-nitroimidazole                                                                                     |
| 325.3667                         | HC1    | Whole Cells          |           |                        |             | <i>No identifications found</i>                                                                                                         |
| 334.3476                         | HC1    | Whole Cells          |           |                        |             | <i>No identifications found</i>                                                                                                         |
| 339.3823                         | HC1    | Whole Cells          |           |                        |             | <i>No identifications found</i>                                                                                                         |
| 353.3978                         | HC1    | Whole Cells          |           |                        |             | <i>No identifications found</i>                                                                                                         |
